# Supplementary material for: nablaColors: A 3D Benchmark for Optical Property Prediction with Solvent-aware Graph Neural Networks
Source: Research Square preprint supplement (doi:10.21203/rs.3.rs-7398508/v1), 2025-11-02
Supplement: Supplementary file 1 [file 78ca0903e1a8f233b700b0c4.pdf]

# Supplementary materials:nablaColors: A 3D Benchmark for Optical Property Prediction with Solvent-aware Graph Neural Networks

Denis Potapov<sup>1,2\*</sup>, Sergei Rogovoi<sup>1,3</sup>, Kuzma Khrabrov<sup>1</sup>,  
Konstantin Ushenin<sup>1,4</sup>, Alexey Korovin<sup>1</sup>, Anton Ber<sup>1</sup>, Artur Kadurin<sup>1,4,5,6</sup>,  
Artem Tsypin<sup>1</sup>

<sup>1\*</sup> AIRI, Moscow, Russia.

<sup>2</sup> Moscow Institute of Physics and Technology, Moscow, Russia.

<sup>3</sup> Lomonosov Moscow State University, Moscow, Russia.

<sup>4</sup> Tomsk State University, Tomsk, Russia.

<sup>5</sup> Kuban State University, Krasnodar, Russia.

<sup>6</sup> ISP RAS Research Center for Trusted Artificial Intelligence, Moscow, Russia.

\*Corresponding author(s). E-mail(s): [potapov@airi.net](mailto:potapov@airi.net);

Contributing authors: [rogovoi@airi.net](mailto:rogovoi@airi.net); [khrabrov@airi.net](mailto:khrabrov@airi.net); [ushenin@airi.net](mailto:ushenin@airi.net);  
[korovin@airi.net](mailto:korovin@airi.net); [ber@airi.net](mailto:ber@airi.net); [kadurin@airi.net](mailto:kadurin@airi.net); [tsypin@airi.net](mailto:tsypin@airi.net);

## S1 Training details

### S1.1 Pretraining setup

All 3D models were initialized from pretrained weights obtained on the the HOMO–LUMO gap prediction task. estimating the HOMO–LUMO energy gap. Hydrogen atoms were excluded from all molecular structures during both training and evaluation to reduce model complexity and computational cost.

PaiNN, DimeNet++, eSCN, and GemNet were pretrained by us on the full PCQM4Mv2 dataset, which contains DFT-calculated orbital properties for approximately 3.8 million molecules. UniMol+ was initialized from the official PCQM4Mv2 checkpoint released by the authors.

### S1.2 Evaluation protocol

To select optimal hyperparameters and model checkpoints, we used the validation set from the proposed  $\nabla\text{Colors-3D}$  benchmark. The validation set was also used for early stopping and to adjust the learning rate (**ReduceLROnPlateau**). To ensure fair comparison, all models—including different architectures and conformer settings—were trained on identical data splits and corresponding molecular conformations.

### S1.3 Finetuning setup

The models were originally trained to predict HOMO-LUMO gap. To finetune on the  $\nabla\text{Colors-3D}$ , we replace the regression head with a randomly initialized one. We then explore two strategies: 1) finetuning the model with a randomly initialized regression head end-to-end and 2) pretraining the regression head with a frozen backbone and then training the whole model end-to-end. We call these two setups “random” and “staged”.

While most models showed comparable performance under both protocols, the staged approach was crucial for UniMol+, enabling a more stable training process and improved final performance. This effect was consistent across all conformer types.

### S1.4 Training Hyperparameters

**Table S1:** Key hyperparameters for the models used in this study. For the 3D models (PaiNN, DimeNet++, eSCN, GemNet), we report parameters for the `OneCycleLR` scheduler. An alternative `ReduceLROnPlateau` scheduler was also tested. For Chemprop, we report the hyperparameters from our best-performing configuration.

|                                 | Chemprop             | PaiNN                | DimeNet++            | eSCN                 | GemNet               | UniMol+              |
|---------------------------------|----------------------|----------------------|----------------------|----------------------|----------------------|----------------------|
| <i>Training Hyperparameters</i> |                      |                      |                      |                      |                      |                      |
| Optimizer                       | Adam                 | AdamW                | AdamW                | AdamW                | AdamW                | Adam                 |
| Batch Size                      | 128                  | 32                   | 64                   | 32                   | 32                   | 6                    |
| Loss Function                   | MSE                  | MAE (L1)             | MAE (L1)             | MAE (L1)             | MAE (L1)             | UniMol+ loss         |
| LR Scheduler                    | Cyclical             | OneCycleLR           | OneCycleLR           | OneCycleLR           | OneCycleLR           | Polynomial Decay     |
| Max LR                          | $1.0 \times 10^{-3}$ | $5.0 \times 10^{-4}$ | $1.0 \times 10^{-3}$ | $1.0 \times 10^{-3}$ | $1.0 \times 10^{-3}$ | $8.0 \times 10^{-5}$ |
| Epochs                          | 300                  | 450                  | 450                  | 450                  | 450                  | —                    |
| Total Steps                     | —                    | —                    | —                    | —                    | —                    | 300,000              |
| Warmup                          | 20 epochs            | 30% of steps         | 30% of steps         | 30% of steps         | 30% of steps         | 30,000 steps         |
| EMA Decay                       | —                    | —                    | —                    | —                    | —                    | 0.999                |
| <i>Model Architecture</i>       |                      |                      |                      |                      |                      |                      |
| Layers                          | 5 (depth)            | 3                    | 6                    | 8                    | 4                    | 6                    |
| Hidden size                     | 482                  | 128                  | 128                  | 128/256              | 256                  | 768                  |
| Cutoff (Å)                      | —                    | 5.0                  | 5.0                  | 8.0                  | 12.0                 | —                    |
| Attention Heads                 | —                    | —                    | —                    | —                    | —                    | 48                   |

The main hyperparameters for training the models on absorption maximum wavelength prediction are detailed in Table S1. All models were trained with zero weight decay.

For the multi-target setup, we adopted the same hyperparameters but with key modifications to address the different prediction tasks. To handle the prediction of quantum yield (a value between 0 and 1), we applied a **logit transform** to the target values before calculating the loss. This transformation, defined as  $\text{logit}(p) = \log(\frac{p}{1-p})$ , maps the target to the range of real numbers, which is better suited for regression. To ensure numerical stability, the quantum yield values were clamped within the range  $[3 \times 10^{-5}, 0.999 + 1 \times 10^{-5}]$  prior to transformation. In addition, we introduce loss weight coefficients. The coefficients were set to  $[1, 1, 10]$  for the absorption wavelength, the emission wavelength, and the quantum yield, respectively, to align the quantum yield loss values with the absorption and emission loss values.

## S2 Additional experiments

**Table S2:** Impact of regression-head initialization on *dft implicit-solvent* conformers. Columns show Train/Test MAE (nm) for **Random** vs. **Pretrained** heads

| Model     | Random      |            | Pretrained  |            |
|-----------|-------------|------------|-------------|------------|
|           | Train MAE ↓ | Test MAE ↓ | Train MAE ↓ | Test MAE ↓ |
| DimeNet++ | 3.522       | 25.062     | 2.848       | 18.457     |
| ESCN      | 2.651       | 21.949     | 2.419       | 22.147     |
| GemNet    | 1.790       | 20.640     | 1.785       | 21.316     |
| Unimol+   | 5.447       | 22.019     | 5.491       | 18.358     |
| UniProp   | 1.771       | 19.682     | 1.788       | 17.744     |

## S2.1 Impact of Regression Head Initialization

We found that the effectiveness of head pretraining depends on the expressivity of the regression head.

UniMol+, for example, utilizes a simple regression heads that is composed of two linear layers with GELU activation and layer normalization. UniMol+-based models consistently benefited from head pretraining, particularly when trained with lower-quality input geometries.

In contrast, GemNet’s default regression head consists of an initial dense layer followed by multiple residual layers. Despite its expressive capacity, this configuration leads to overfitting when the backbone is frozen: the model achieves  $\sim 5$  nm MAE on the training set, but  $\sim 30$  nm on validation and test sets. This suggests that decoder expressiveness can harm generalization in transfer settings.

Less expressive regression heads used in models like DimeNet++, PaiNN, and eSCN demonstrated more stable behavior, but gained less from head pretraining. We hypothesize that this is due to their inability to leverage pretrained features.

Together, these findings highlight that the benefit of head pretraining depends on a balance between capacity and regularization. Pretrained heads are most helpful when the decoder is expressive enough to benefit from pretrained features, but not so complex as to overfit in low-data or frozen-backbone regimes.

## S2.2 Combined Cross-Validation Results

**Table S3:** Consolidated cross-validation MAE metrics.

| Model                | Target     | Fold 1                   | Fold 2 | Fold 3 | Fold 4 | Fold 5 | Mean Val Loss            |
|----------------------|------------|--------------------------|--------|--------|--------|--------|--------------------------|
| <b>Single Target</b> |            |                          |        |        |        |        |                          |
| UniProp              | absorption | 15.797 ( <i>29.077</i> ) | 15.899 | 14.528 | 15.217 | 14.962 | 15.280 ( <i>17.936</i> ) |
| Chemprop             | absorption | 26.034 ( <i>41.780</i> ) | 22.109 | 19.118 | 20.475 | 20.970 | 21.741 ( <i>24.890</i> ) |
| <b>Multitarget</b>   |            |                          |        |        |        |        |                          |
| UniProp              | absorption | 15.282 ( <i>29.806</i> ) | 14.258 | 14.871 | 16.251 | 17.192 | 15.570 ( <i>18.475</i> ) |
|                      | emission   | 20.334                   | 17.863 | 20.250 | 19.709 | 21.314 | 19.894                   |
|                      | PLQY       | 0.165                    | 0.159  | 0.162  | 0.147  | 0.146  | 0.155                    |
| Chemprop             | absorption | 21.938 ( <i>36.900</i> ) | 20.144 | 21.621 | 22.550 | 23.787 | 22.008 ( <i>25.000</i> ) |
|                      | emission   | 29.567                   | 26.022 | 28.741 | 27.595 | 29.904 | 28.366                   |
|                      | PLQY       | 0.184                    | 0.175  | 0.177  | 0.158  | 0.176  | 0.174                    |

This section reports full five-fold cross-validation metrics for the best 2D baseline and for our proposed UniProp model. We first train both models in a single-task setting to predict only the peak absorption wavelength. We then train them in a multitask setting in which, for each chromophore-solvent pair, the models jointly predict the peak absorption wavelength, the peak emission wavelength, and the photoluminescence quantum yield (PLQY). For **Fold 1**, we report two MAE values due to the betaine dye36 issue described in Section 3.3. The italicized MAE is computed on the full fold. The non-italicized MAE is computed on the same fold after excluding the  $\sim 200$  samples in which the chromophore is betaine dye36.

## S2.3 Conformer calculation times

In this section, we provide details on time it takes to calculate optimized geometries using different levels of quantum theory.

**Table S4:** CPU times for conformer calculations using different methods. Times are in seconds, minutes and hours.

| Method       | Mean                  | Median              | Max         | Total time |
|--------------|-----------------------|---------------------|-------------|------------|
| Orca Solvent | 1493.98 s (24.90 min) | 373.20 s (6.22 min) | 6554.51 min | 10940.93 h |
| Orca Vacuum  | 1127.32 s (18.79 min) | 342.13 s (5.70 min) | 1939.08 min | 4301.04 h  |
| XTB Vacuum   | 27.54 s (0.46 min)    | 9.01 s (0.15 min)   | 25.32 min   | 118.65 h   |

## S2.4 Training curves

In this section, we provide full training plot for the solvent-aware variants of 3D GNNs. Each row corresponds to a single model. The left subplot in each row depicts training loss, whereas the right subplot depicts the validation loss. In each subplot, we provide three curves, corresponding to different conformation types.

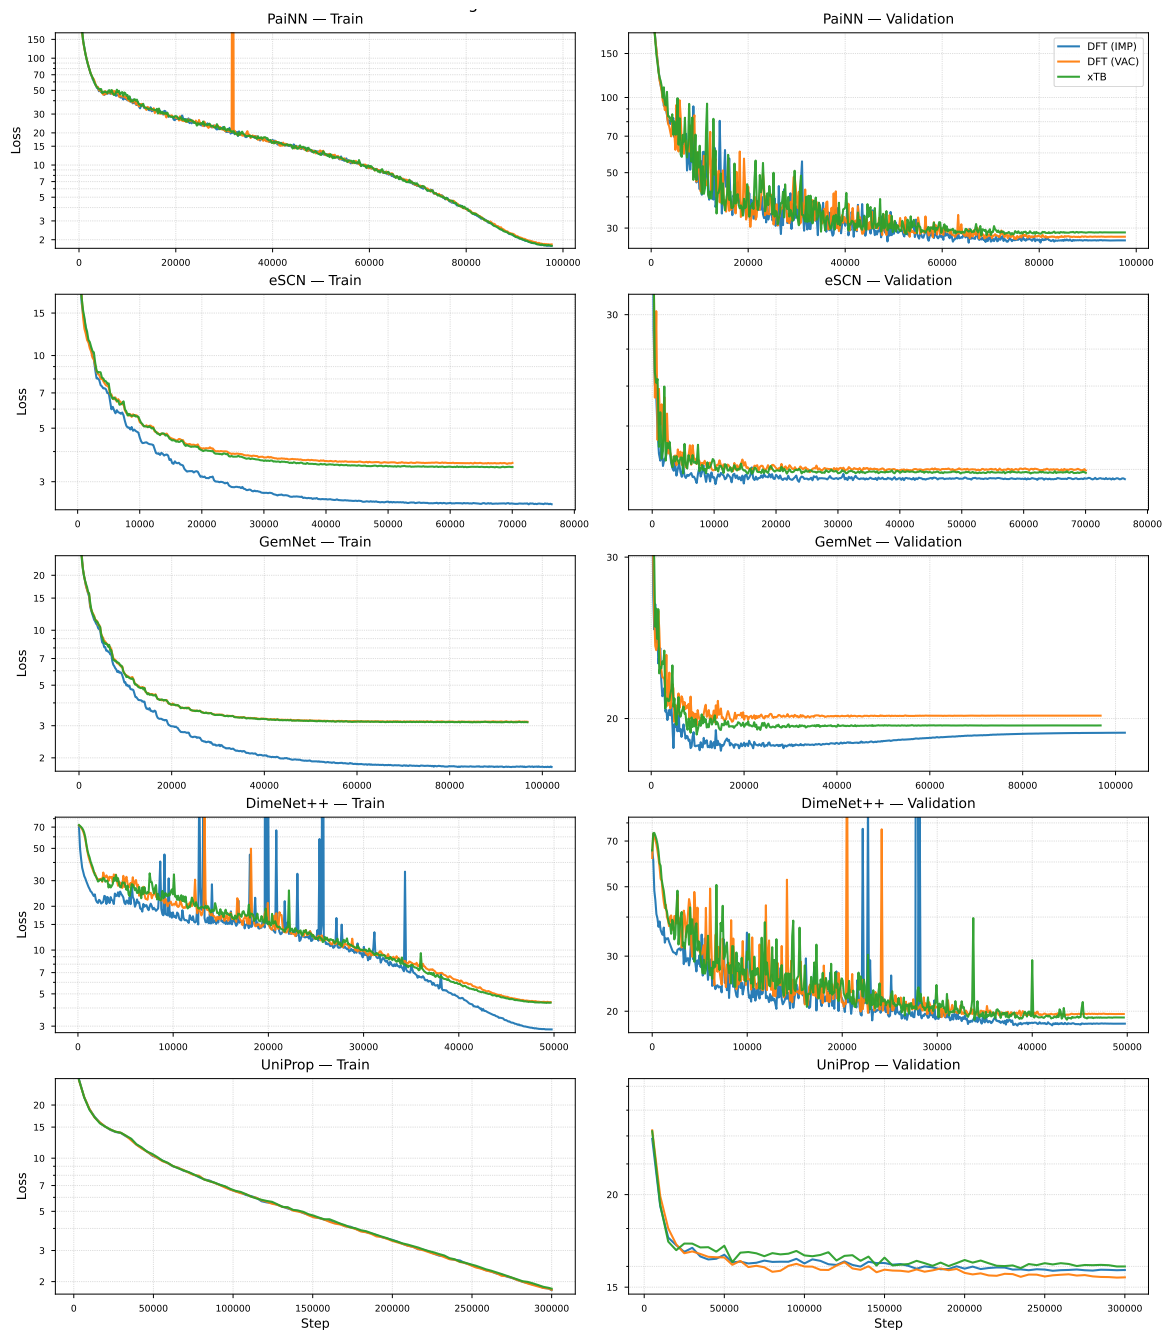

**Fig. S1:** Training curves for the solvent-aware variants of 3D GNNs. The y-axis is log-scaled.
